# Supplementary figures and images for: Simultaneous removal of NOX and SO2 with H2O2 over Fe based catalysts at low temperature
Source: Royal Society of Chemistry journal article supplement (doi:10.1039/c3ra46418k), 2013-12-10

## Fe2p in Fe-Al

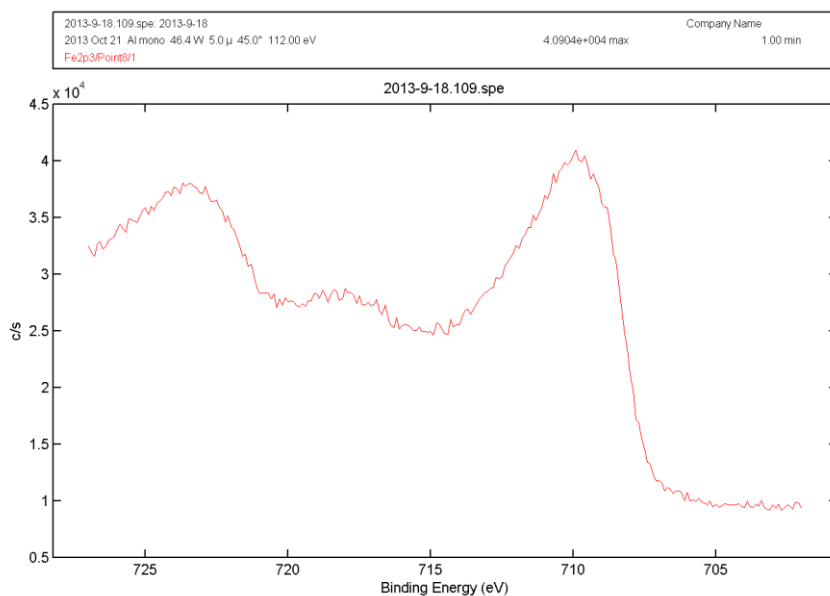

## O1s in Fe-Al

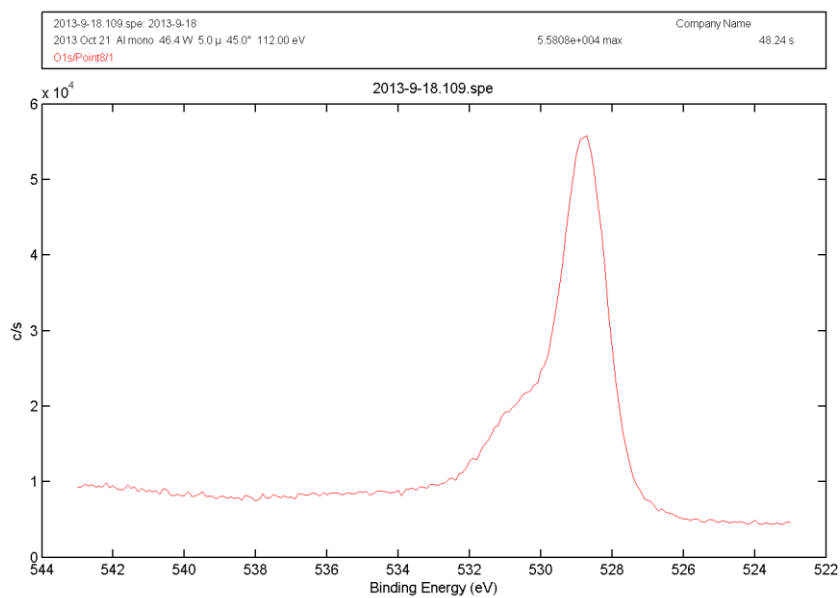

## Fe2p in Fe-Ti

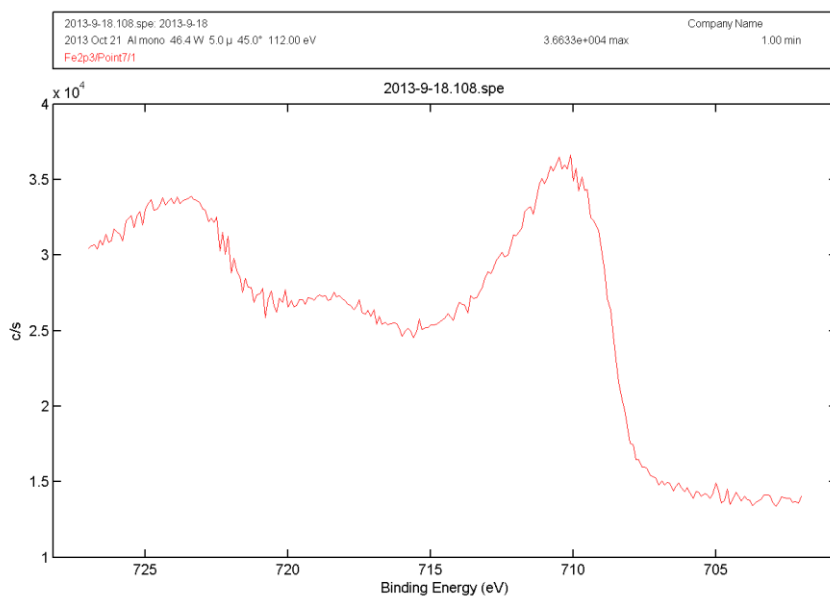

## O1s in Fe-Ti

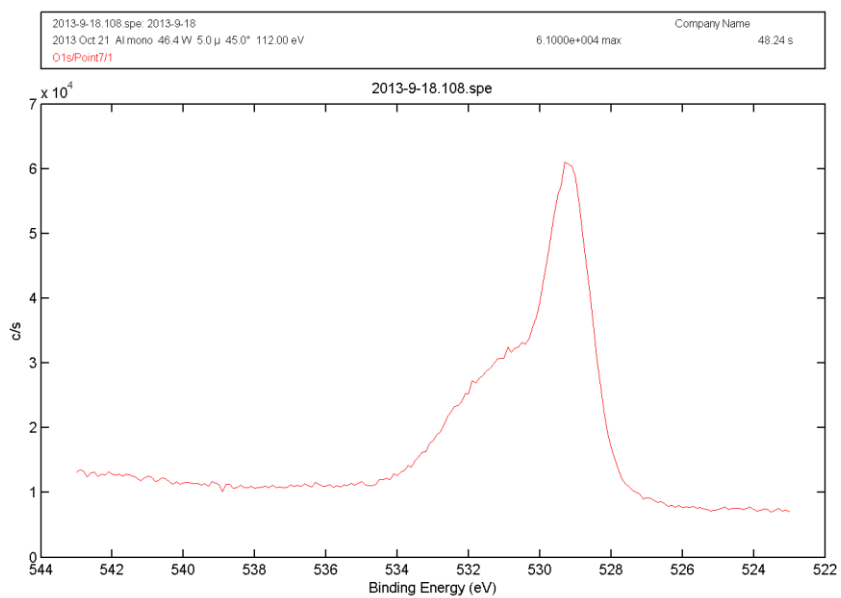

Supplement: c3ra46418k_2.pdf [file c3ra46418k_2.pdf]
